# Supplementary material
Source: Springer Nature journal article supplement (https://www.springermedizin.de/resource/supplementary/13550_2012_71_MOESM7_ESM.pdf/9687552)

**Supplementary Figure 10. Contrast recovery with and without post filter for Siemens Symbia T6.** Reconstructions were performed with Siemens Flash3D including attenuation and scatter correction and resolution recovery and eight subsets. (A, B) Hot rods. (C, D) Cold rods. (A, C) Full ROI. (B, D) Half ROI.

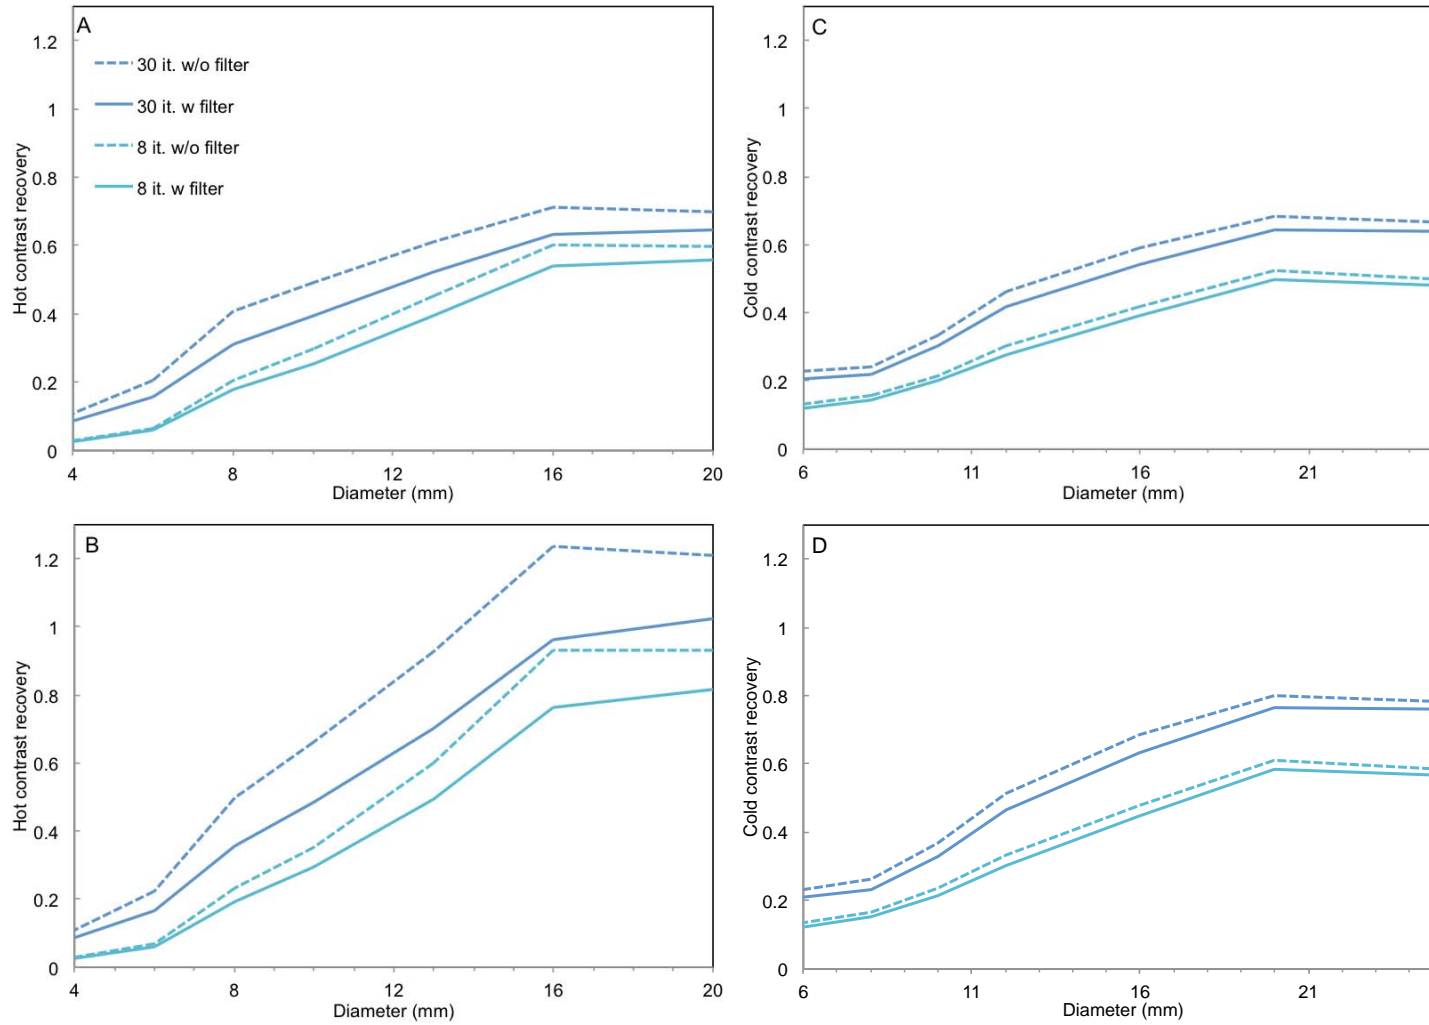

Supplement: MOESM7 [file 9687552]
